# Supplementary material for: Color-transparency dual-control devices based on patterned electrode-induced limited assembly of photonic liquid
Source: Royal Society of Chemistry journal article supplement (doi:10.1039/d3tc00642e), 2023-01-01
Supplement: d3tc00642e1.pdf [file d3tc00642e1.pdf]

Color-transparency dual-control devices based on patterned electrode-induced  
limited assembly of photonic liquid

Xuejuan Liu<sup>a</sup>, Zhe Wang<sup>b</sup>, Yang Liu<sup>c</sup>, Lili Yang<sup>a,\*</sup>, Dengteng Ge<sup>c</sup>

<sup>a</sup> State Key Laboratory for Modification of Chemical Fibers and Polymer Materials,  
College of Materials Science and Engineering, Donghua University, Shanghai 201620,  
China

<sup>b</sup> Beijing Spacecrafts, China Academy of Space Technology, Beijing 100094, China

<sup>c</sup> Institute of Functional Materials, Donghua University, Shanghai 201620, China

\*Corresponding author. *E-mail address:* [liliyang@dhu.edu.cn](mailto:liliyang@dhu.edu.cn).

This PDF includes:

Fig. S1 to Fig. S8

Legends for Video S1

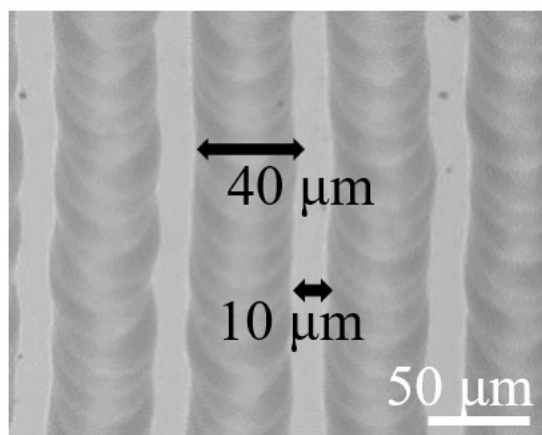

Fig. S1 Optical image of patterned electrode.

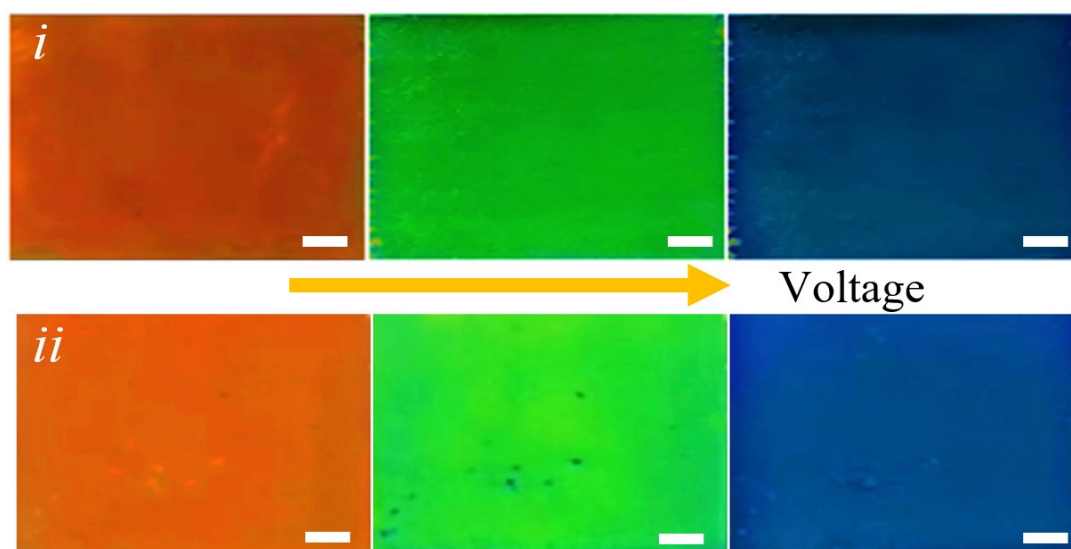

Fig. S2 Optical images CD and PED under different voltages with concentration of 20%. (i) PED and (ii) CD. Scale bar: 1 mm.

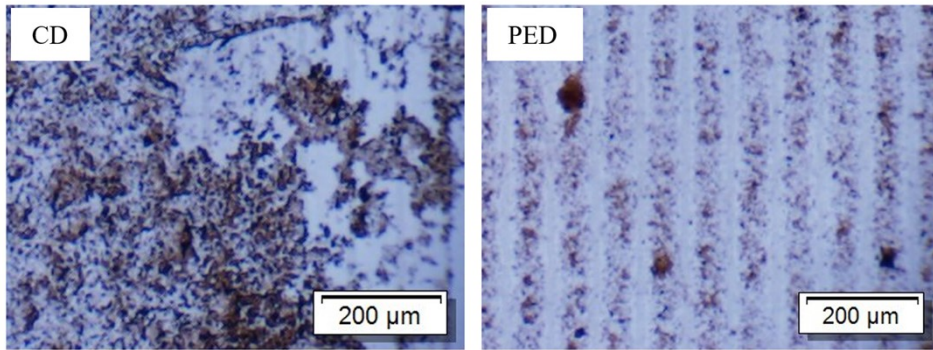

Fig. S3 Optical images of NPs on CD and PED via the removal of solvent under high voltage (6V)

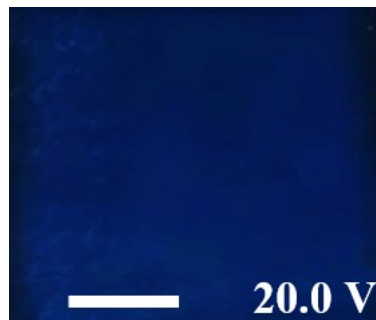

Fig. S4 Picture of PED with 20 wt% of NPs. Scale bar: 5 mm.

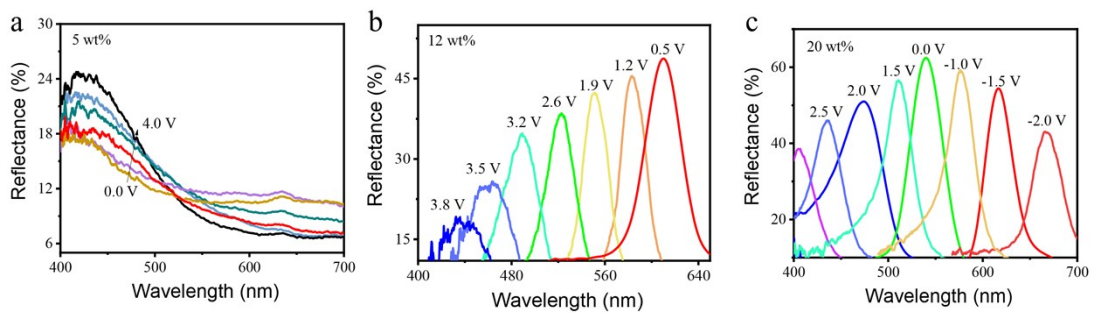

Fig. S5 Reflectance spectra of PED with different concentrations of particle. (a) 5 wt%; (b) 12 wt%, (c) 20 wt%.

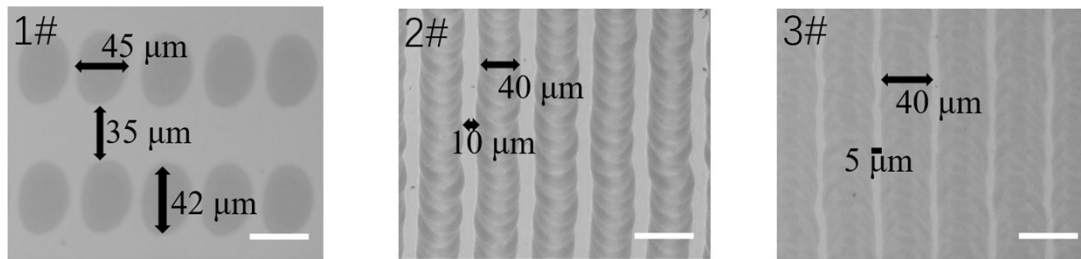

Fig. S6 Optical image of three kinds of patterned electrode. Scale bar: 50  $\mu\text{m}$

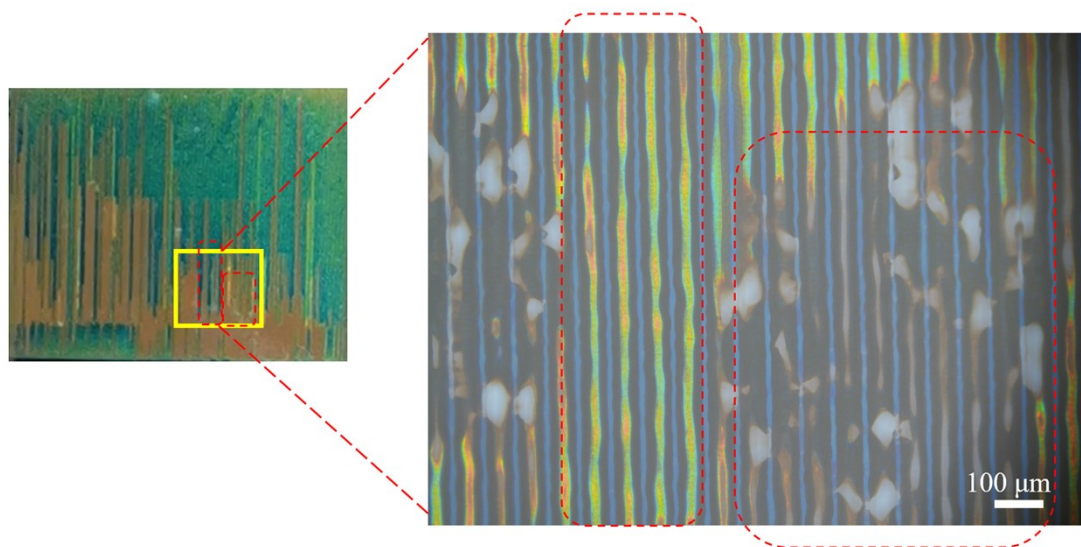

Fig. S7 Low-resolution and high-resolution optical images of 3# electrode under voltage of 4V

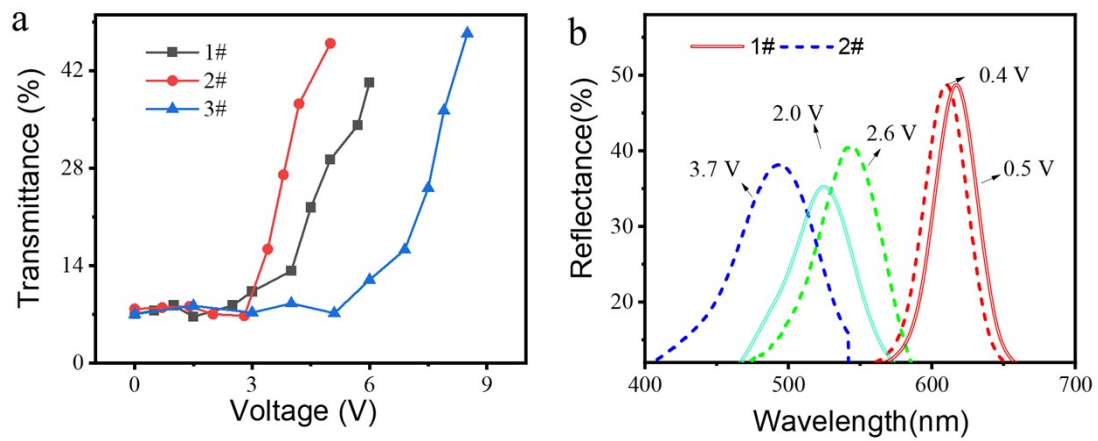

Fig. S8 (a) Transmittance spectra of three devices under different voltages. (b) Reflectance spectra of devices based on 1# and 2# electrodes.

---

Legends for the supplementary videos

Video S1 Color-transparency dual-control of our electroresponsive device
